# Supplementary material
Source: PubMed Central journal article supplement (PMC4866930)

**Appendix 1 (as supplied by the authors): Incidence rates of prostate cancer by age group, 1969-2007, Canada (logarithmic Y axis)**

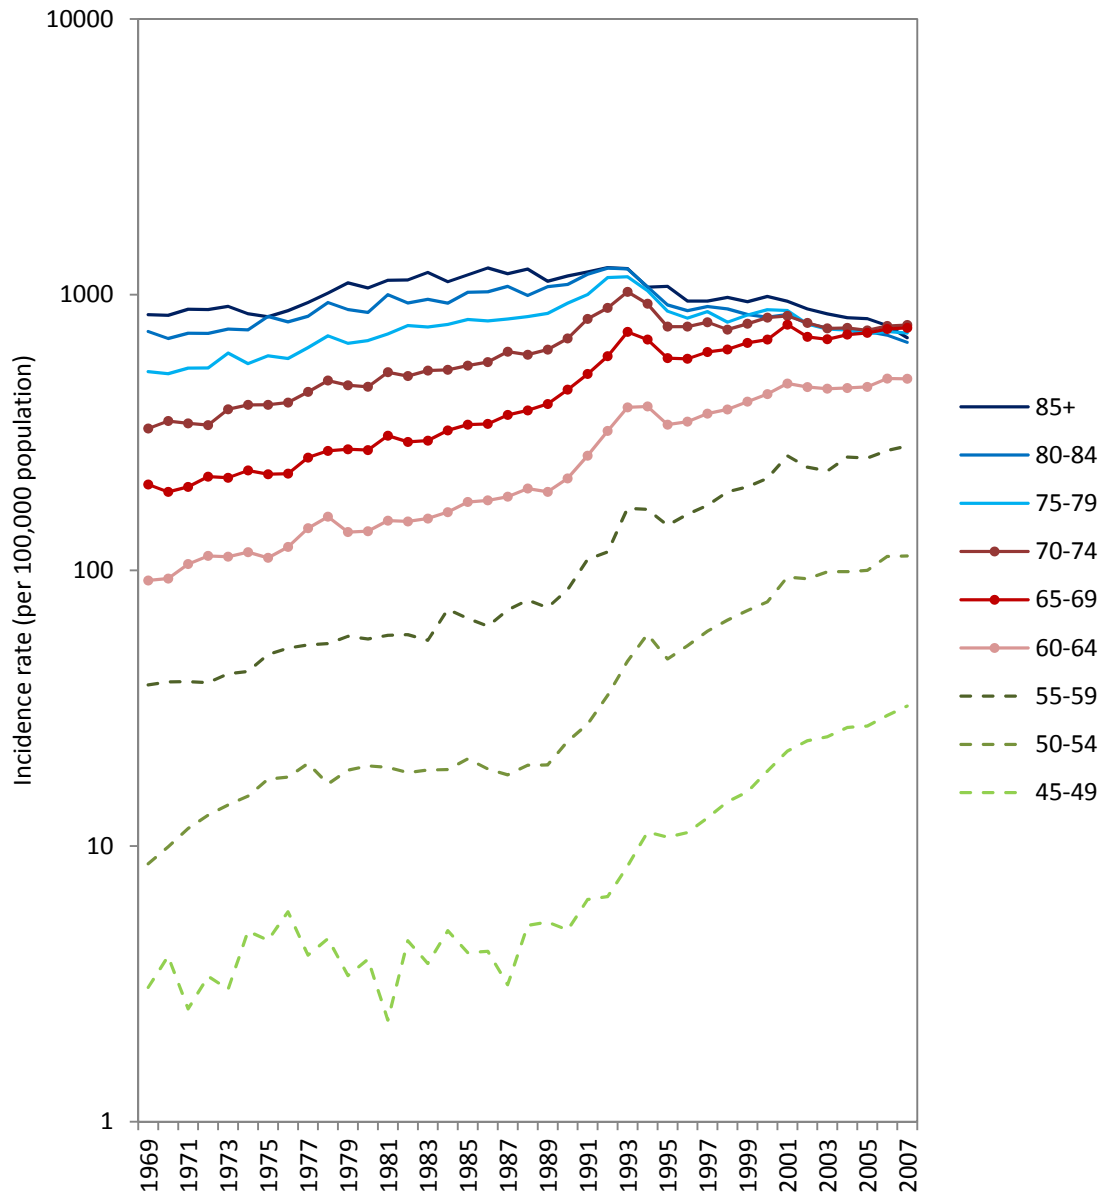

Supplement: supp_4.1.E73_2014-0079-1-at.pdf [file supp_4.1.E73_2014-0079-1-at.pdf]
