# Supplementary material
Source: PubMed Central journal article supplement (PMC4866930)

Appendix 2 (as supplied by the authors): Mortality of prostate cancer by age group, 1969-2009, Canada (logarithmic Y axis).

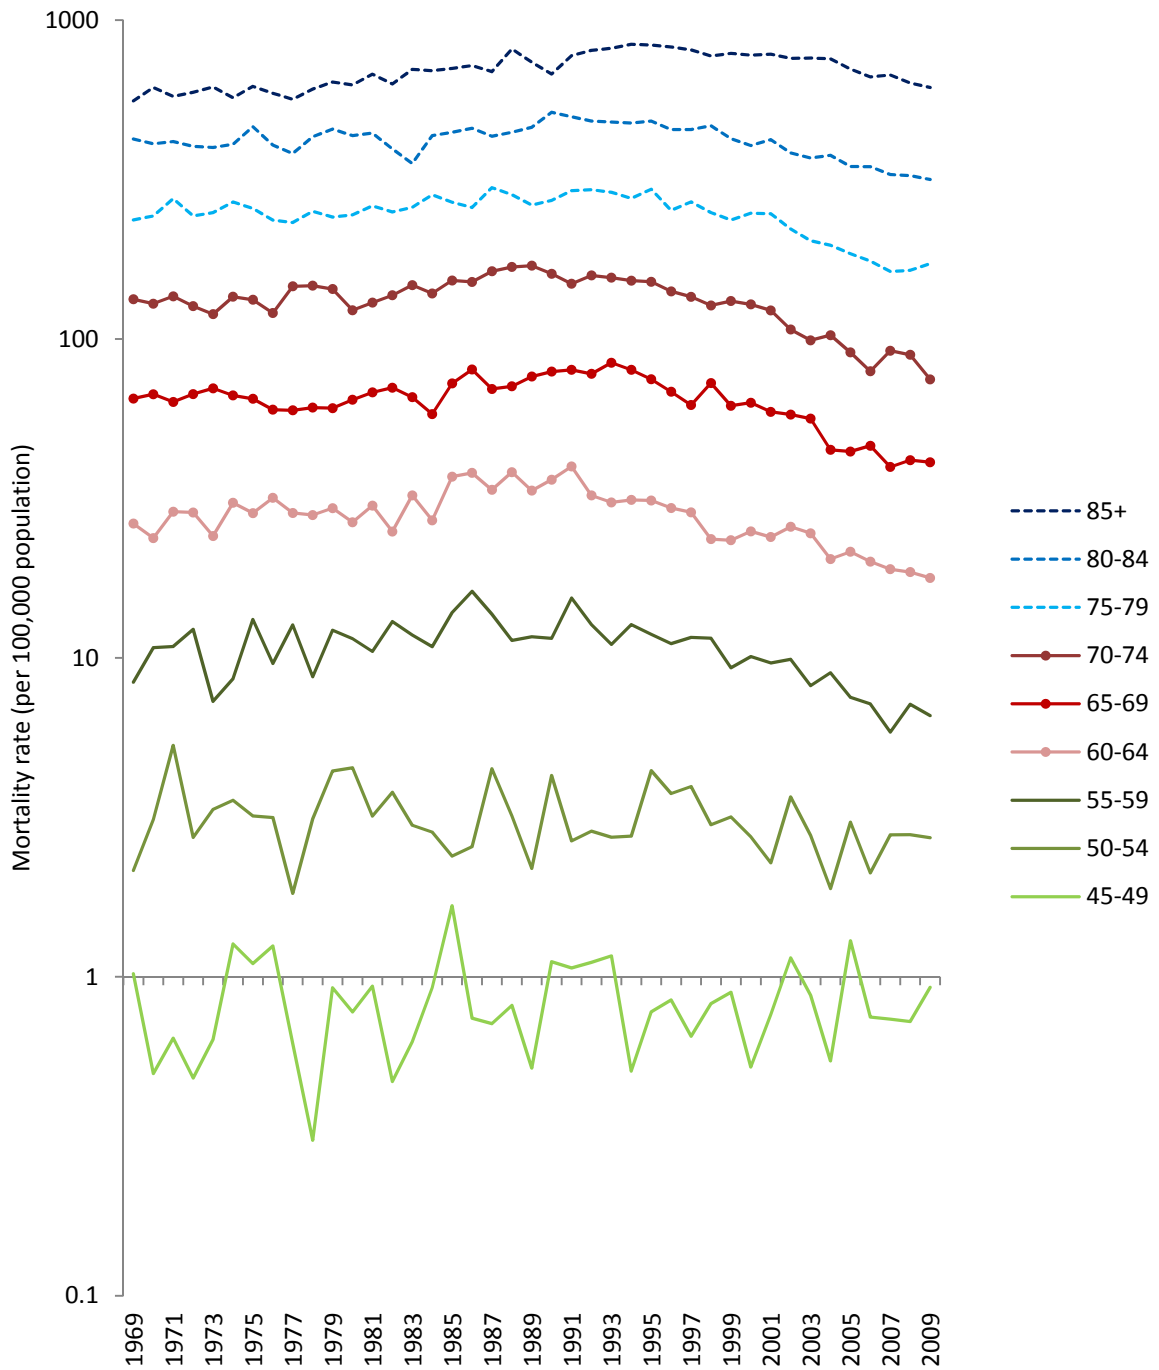

Supplement: supp_4.1.E73_2014-0079-2-at.pdf [file supp_4.1.E73_2014-0079-2-at.pdf]
